# Supplementary material
Source: MDPI journal article supplement (https://www.mdpi.com/2227-9717/7/3/126)
Supplement: s1 [file s1]

# Supplementary Materials: Water–Organic Solvent Extraction of Phenolic Antioxidants from Brewers' Spent Grain

Antonio Zuorro, Annalaura Iannone and Roberto Lavecchia

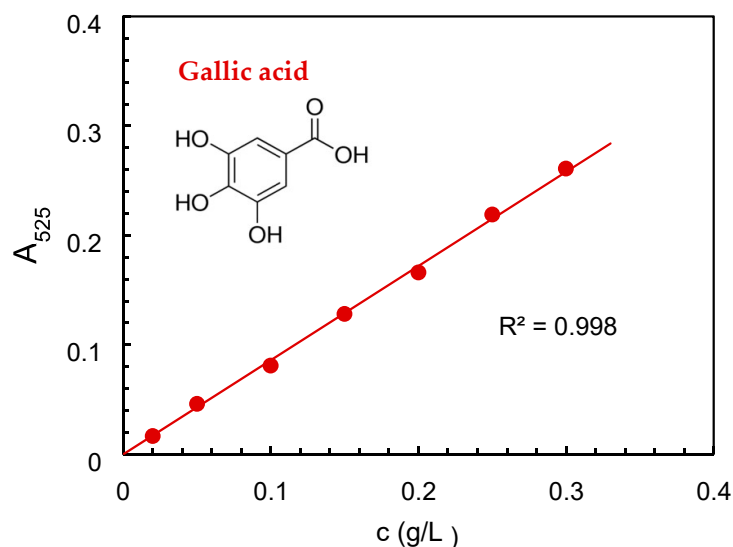

**Figure 1.** Calibration curves for evaluation of total phenolics.

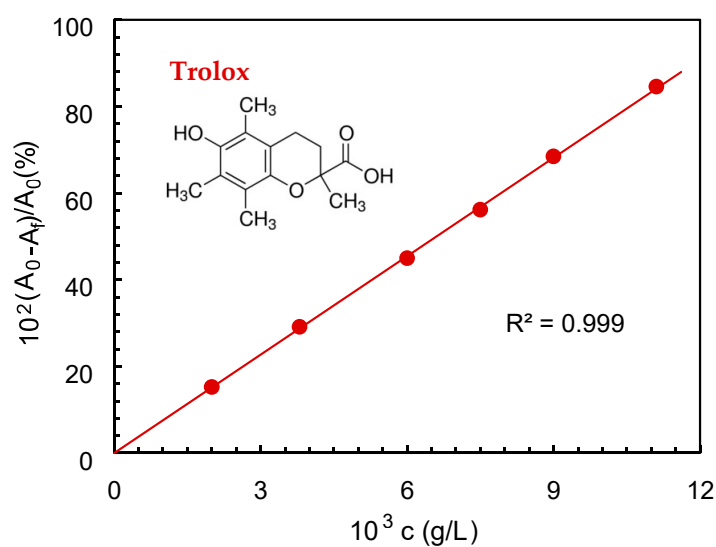

**Figure S2.** Calibration curves for evaluation of DPPH antioxidant activity.
